# Supplementary material for: Diosgenin Targets CaMKK2 to Alleviate Type II Diabetic Nephropathy through Improving Autophagy, Mitophagy and Mitochondrial Dynamics
Source: MDPI journal article supplement (doi:10.3390/nu15163554), 2023-08-11
Supplement: s1 [file s1]

## Supporting information

### Diosgenin targets CaMKK2 to alleviate type II diabetic nephropathy through improving autophagy, mitophagy and mitochondrial dynamics

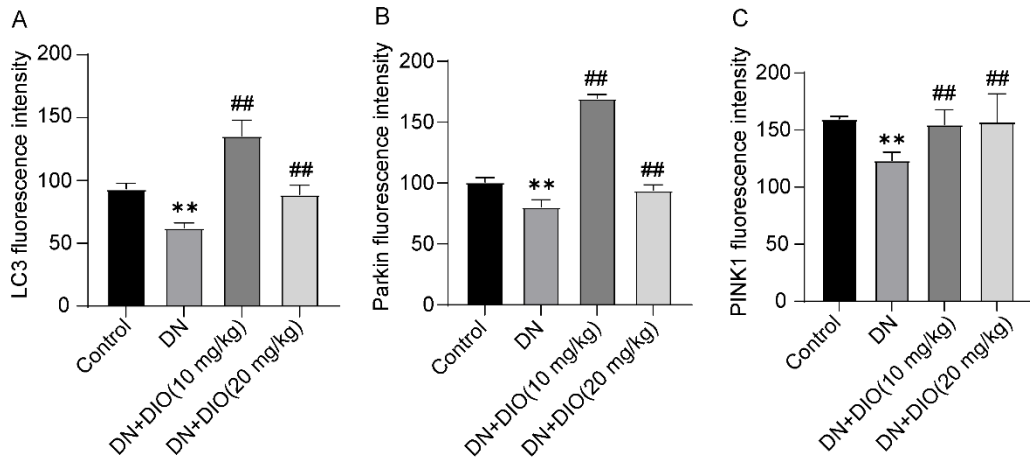

**Figure S1.** DIO restored autophagy and mitophagy in DN rats. **(A)** Quantification of LC3 immunofluorescence. **(B)** Quantification of Parkin immunofluorescence. **(C)** Quantification of PINK1 immunofluorescence. Data are expressed as mean  $\pm$  SD,  $n = 6$ . \* $P < 0.05$  and \*\* $P < 0.01$ , significantly different from the Control group; # $P < 0.05$  and ## $P < 0.01$ , significantly different from the DN group.

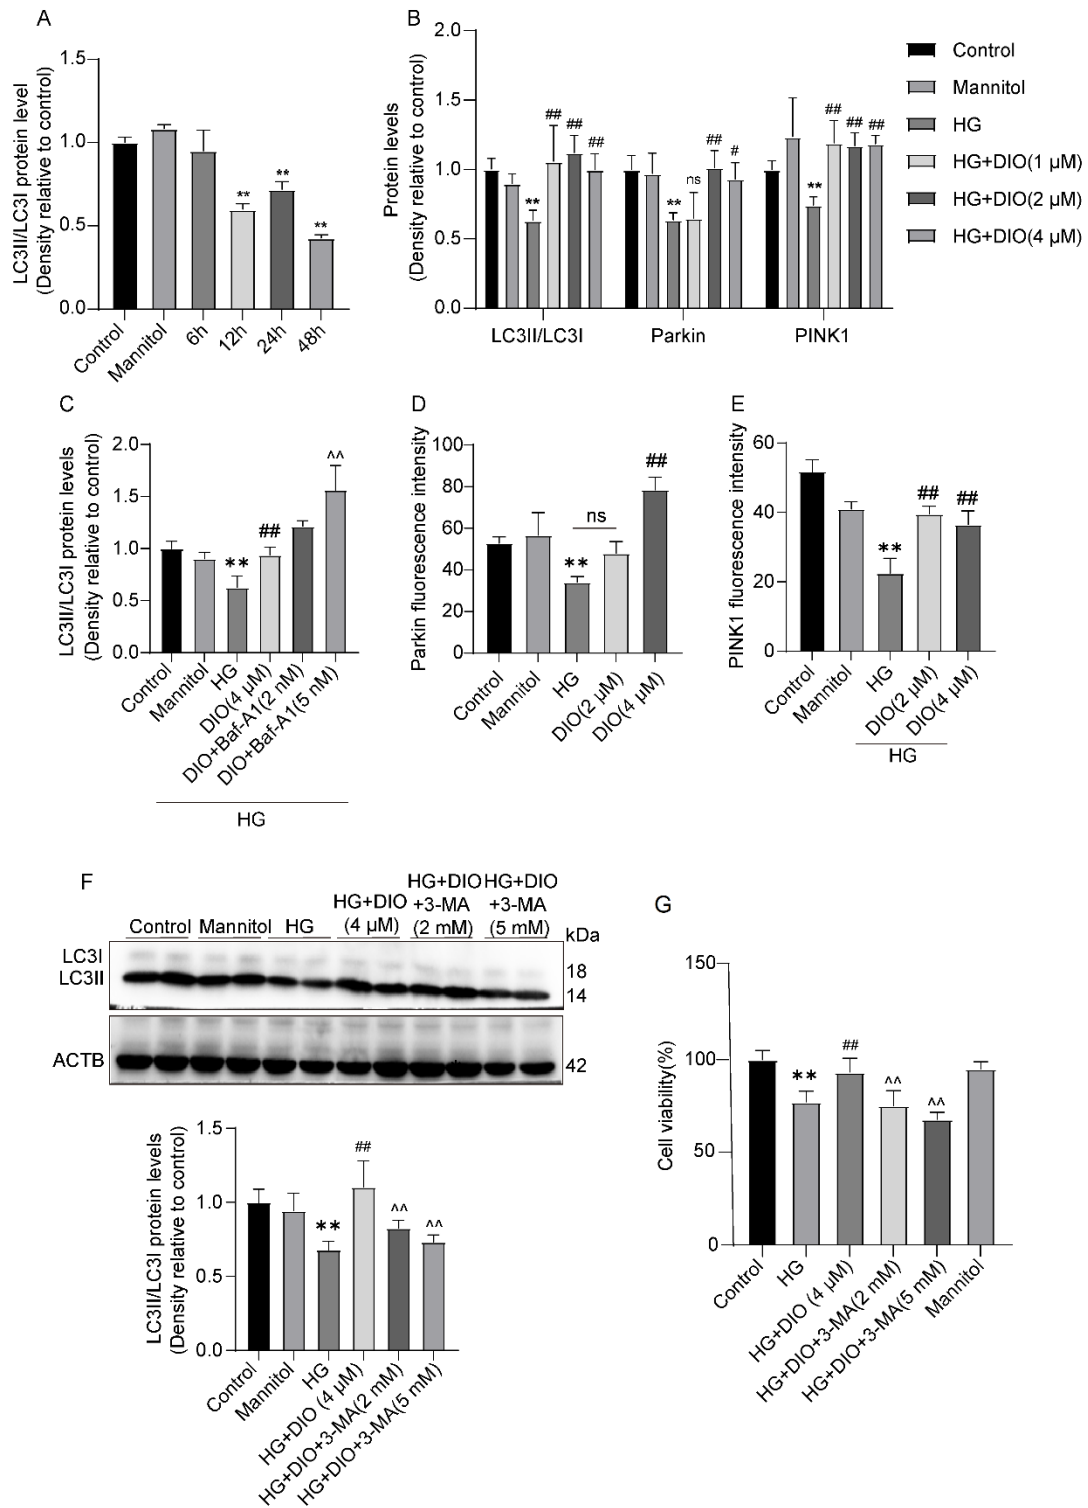

**Figure S2.** DIO induced autophagy and mitophagy in HK-2 cells exposed to HG. **(A)** Quantification of LC3 protein expression after HG (30 mM) treatment for 6, 12, 24, and 48 h. **(B)** Quantification of LC3, Parkin, and PINK1 protein expressions after DIO treatment. **(C)** Quantification of LC3 protein expression of HG+DIO+Baf-A1 treatment. **(D)** Quantification of Parkin

immunofluorescence after DIO treatment. **(E)** Quantification of PINK1 immunofluorescence after DIO treatment. **(F)** Western blot image and quantification of LC3 expression after 3-MA treatment; **(G)** Cell viability after 3-MA treatment. Data are expressed as mean  $\pm$  SD, n = 6. \* $P$  < 0.05 and \*\* $P$  < 0.01, significantly different from the Control group; # $P$  < 0.05 and ## $P$  < 0.01, significantly different from the HG group. ^ $P$  < 0.05 and ^^ $P$  < 0.01 significantly different from HG+DIO group.

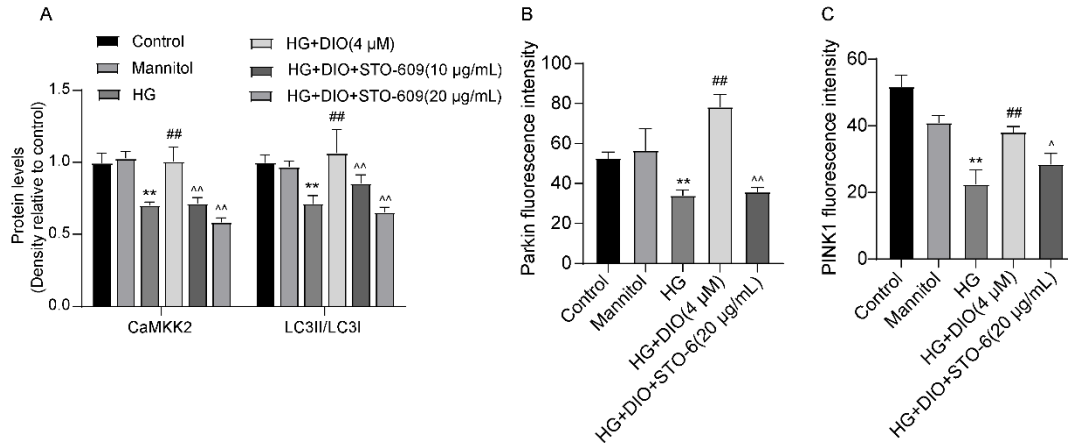

**Figure S3.** Inhibition of CaMKK2 abolished autophagy and mitophagy induced by DIO in HK-2 cells. **(A)** Quantification of CaMKK2 and LC3 protein expressions. **(B)** Quantification of Parkin immunofluorescence. **(C)** Quantification of PINK1 immunofluorescence. Data are expressed as mean  $\pm$  SD, n = 6. \* $P$  < 0.05 and \*\* $P$  < 0.01, significantly different from the Control group; # $P$  < 0.05 and ## $P$  < 0.01, significantly different from the HG group; ^ $P$  < 0.05 and ^^ $P$  < 0.01 significantly different from HG+DIO group.

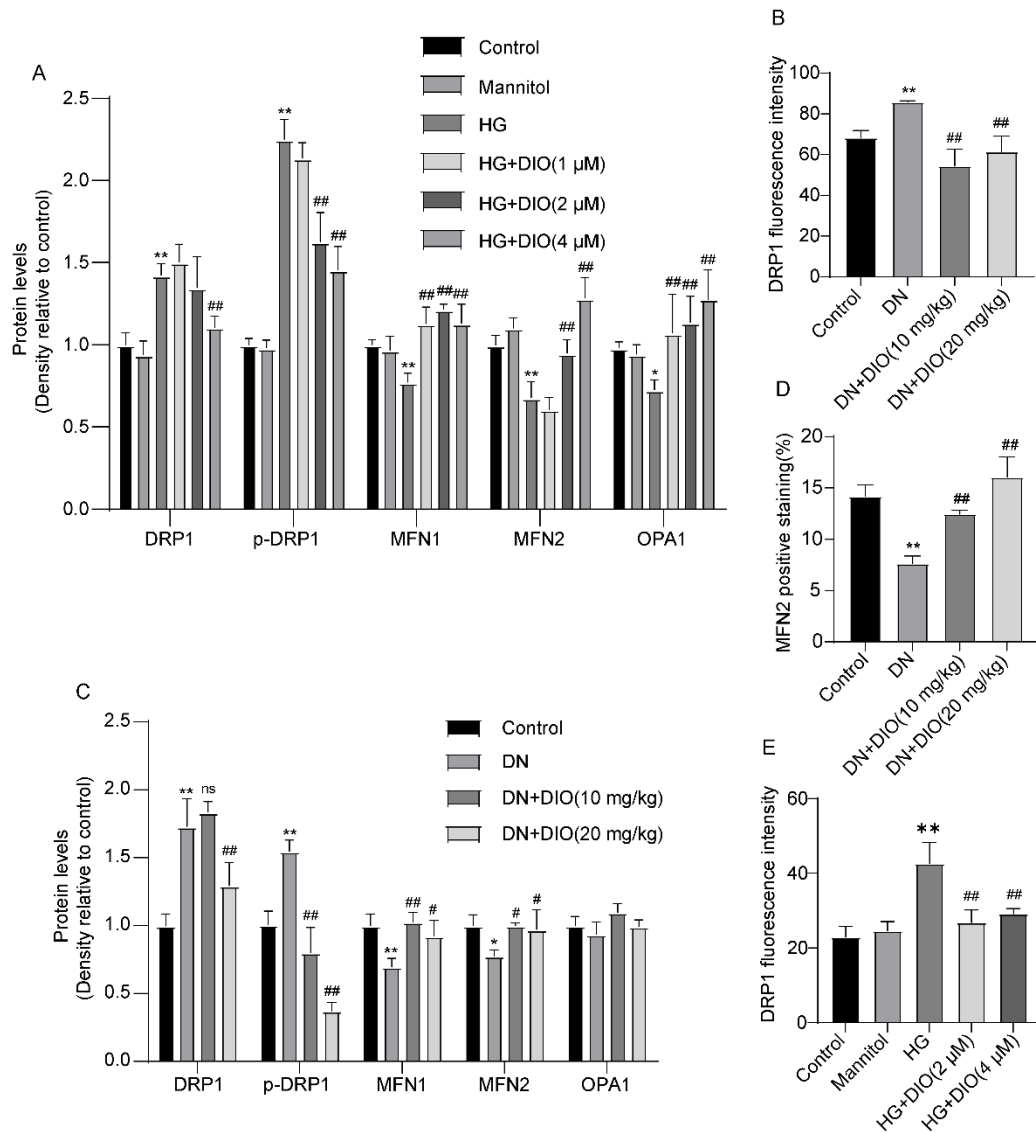

**Figure S4.** DIO improved mitochondrial dynamics in DN rats and in HK-2 cells exposed to HG.

**(A)** Quantification of DRP1, p-DRP1, MFN1, MFN2, and OPA1 protein expressions in HK-2 cells.

**(B)** Quantification of DRP1 immunofluorescence in DN rats. **(C)** Quantification of DRP1, p-DRP1,

MFN1, MFN2, and OPA1 protein expressions in DN rats. **(D)** Quantification of MFN2

immunohistochemistry in DN rats. **(E)** Quantification of DRP1 immunofluorescence in HK-2 cells.

Data are expressed as mean  $\pm$  SD,  $n = 6$ .  $*P < 0.05$  and  $**P < 0.01$ , significantly different from the

Control group;  $\#P < 0.05$  and  $##P < 0.01$ , significantly different from the DN or HG group.

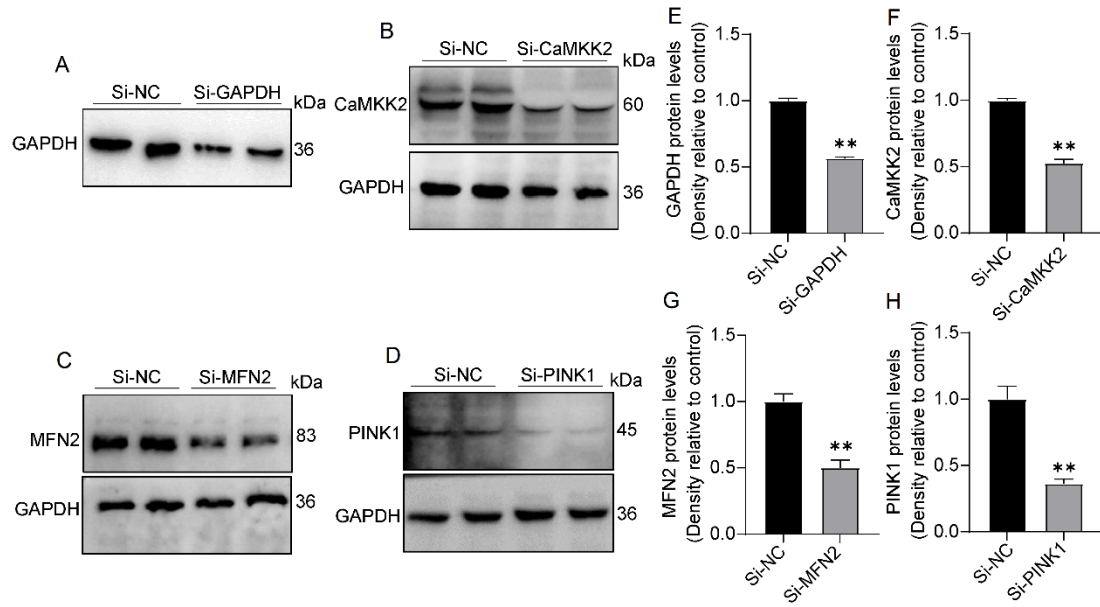

**Figure S5.** The interference efficiency of CaMKK2, PINK1, and MFN2 in HK-2 cells. **(A)** Western blot image of GAPDH. **(B)** Western blot images of CaMKK2 and GAPDH. **(C)** Western blot images of MFN2 and GAPDH. **(D)** Western blot images of PINK1 and GAPDH. **(E)** Quantification of GAPDH protein expression. **(F)** Quantification of CaMKK2 protein expression. **(G)** Quantification of MFN2 protein expression. **(H)** Quantification of PINK1 protein expression. Data are expressed as mean  $\pm$  SD,  $n = 6$ . \* $P < 0.05$  and \*\* $P < 0.01$ , significantly different from the Control group.
